# Supplementary material
Source: PubMed Central journal article supplement (PMC3950330)
Supplement: NIHMS555791-supplement-supplement_1.pdf [file NIHMS555791-supplement-supplement_1.pdf]

Table e1.

Tests of three-way interaction (IV by gender by race) for each path in model.

| DV      | IV        | Null Chi-square | <i>p</i> -value |
|---------|-----------|-----------------|-----------------|
| SMOKING | RESP. ED. | <b>32.00</b>    | <b>.0001</b>    |
|         | PAR. ED.  | <b>17.85</b>    | <b>.0005</b>    |
|         | INCOME    | <b>9.87</b>     | <b>.0197</b>    |
|         | BLT. ENV. | 0.91            | .82             |
| ALCOHOL | RESP. ED. | <b>21.93</b>    | <b>.0001</b>    |
|         | PAR. ED.  | <b>16.25</b>    | <b>.001</b>     |
|         | INCOME    | 4.77            | .19             |
|         | BLT. ENV. | 2.96            | .40             |
| BMI     | RESP. ED. | <b>18.73</b>    | <b>.0003</b>    |
|         | PAR. ED.  | <b>17.69</b>    | <b>.0005</b>    |
|         | INCOME    | <b>21.00</b>    | <b>.0001</b>    |
|         | BLT. ENV. | 6.96            | .07             |
| CRP     | SMOKING   | <b>22.67</b>    | <b>.0001</b>    |
|         | ALCOHOL   | 2.36            | .50             |
|         | BMI       | 2.86            | .41             |
|         | RESP. ED. | 3.86            | .28             |
|         | PAR. ED.  | 2.70            | .44             |
|         | INCOME    | 2.34            | .51             |
|         | BLT. ENV. | 2.50            | .48             |

IV = Independent variable; DV = dependent variable

The null chi-square test compares a model in which a given path coefficient is constrained to be equal across all four gender/race groups to a model in which the same path coefficient is free to vary across groups. This is analogous to a test of a 3-way interaction (independent variable by Sex by Race).
